# Supplementary material for: Optimizing the precursor of sulfur source for hydrothermal synthesis of high performance CdS for photocatalytic hydrogen production
Source: Royal Society of Chemistry journal article supplement (doi:10.1039/c8ra00250a), 2018-01-01
Supplement: c8ra00250a1.pdf [file c8ra00250a1.pdf]

## Optimizing the precursor of sulfur source for hydrothermal synthesis of high performance CdS for photocatalytic hydrogen production

Hui Li<sup>a</sup>, Lihua Liu<sup>a</sup>, Ziqun Wang<sup>a</sup>, Xiuzhen Zheng<sup>a\*</sup>, Sugang Meng<sup>a</sup>, Shifu Chen<sup>a</sup>, Xianliang Fu<sup>a\*</sup>

<sup>a</sup> College of Chemistry and Material Science, Huaibei Normal University, Huaibei, Anhui, 235000, China.

Email: X. Zheng, zyxyz0804@163.com; X. Fu, fuxiliang@gmail.com

**Fig. S1** The emission spectrum of the light source.( measured by SpectriLight ILT 950 spectroradiometer).

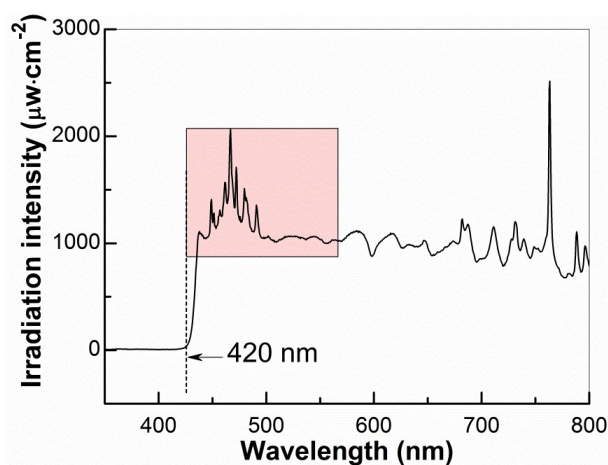

The average intensity of the irradiation for the activation of CdS is ca.  $1.1 \text{ mW}\cdot\text{cm}^{-2}$  (420-570 nm, the spectrum range for the activation of CdS) and the irradiation area is ca.  $28 \text{ cm}^2$ .
